1 Population dynamics of Amazonian floodplain forest species support spatial variation on genetic  
2 diversity but not range expansions through time.

3

4 Gregory Thom<sup>1,2,\*</sup>; Camila C. Ribas<sup>3</sup>; Eduardo Shultz<sup>3</sup>; Alexandre Aleixo<sup>4</sup>; Cristina Y. Miyaki<sup>2</sup>

5

6 <sup>1</sup>Department of Ornithology, American Museum of Natural History, New York, NY 10024,  
7 USA.

8 <sup>2</sup>Departamento de Genética e Biologia Evolutiva, Universidade de São Paulo, Rua do Matão,  
9 277, Cidade Universitária, São Paulo, SP 05508-090, Brazil.

10 <sup>3</sup>Instituto Nacional de Pesquisas da Amazônia (INPA), Av. André Araújo 2936, Manaus, AM  
11 69060-001, Brazil.

12 <sup>4</sup>Finnish Museum of Natural History, University of Helsinki, Helsinki, Finland.

13 \*Corresponding author. Email: [gthomesilva@amnh.org](mailto:gthomesilva@amnh.org)

14

## 15 **Abstract**

16 **Aim:** We tested if historical demographic changes of populations occurring on the floodplains of  
17 a major Amazon Basin tributary could be associated with range expansions from upper and  
18 middle sections of the river, following the establishment of widespread river-created  
19 environments during the Late Pleistocene and Holocene.

20 **Location:** Solimoes River, Western Amazon, South America

21 **Taxon:** *Myrmoborus lugubris*, *Thamnophilus cryptoleucus* and *Myrmotherula assimilis*

22 **Methods:** We analyzed thousands of UltraConserved Elements to explore spatial patterns of  
23 genetic diversity and connectivity between individuals. Range expansions were tested with  
24 alternative methods. We quantified habitat preference for the analyzed species in order to test if  
25 the occupation of dynamic habitats could predict spatial patterns of genetic diversity.

26 **Results:** Our study did not support shared population range expansions related to historical  
27 regionalized changes in habitat availability. We found considerable variation in the spatial  
28 distribution of the genetic diversity between studied taxa, and that species with higher levels of  
29 specialization to dynamic environments have a more heterogeneous distribution of genetic  
30 diversity and reduced levels of gene flow across space.

31 **Main conclusions:** Our results suggest that demographic expansions along the Solimões River  
32 might be linked to geographic homogeneous oscillation in the distribution of floodplain  
33 environments, promoting effective population size changes but not range expansion. We found  
34 that habitat specificity might be a good predictor of population connectivity along the  
35 Amazonian floodplains.

36

## 37 **Introduction**

38 Understanding the factors that shape the spatial distribution of species is a long-standing  
39 challenge in comparative biology that is attributable to the complex interaction of environmental  
40 and species trait variables. Over evolutionary time scales the geographic distribution of  
41 populations might be affected by physiographic processes (Silva et al., 2019; Peter et al., 2020),  
42 climatic oscillations (Hewitt, 2000; Raposo do Amaral et al., 2018; Musher et al., 2020), biotic  
43 interactions (Araújo & Luoto, 2007; Wisz et al., 2013), and trait evolution (Alves et al., 2019),  
44 driving dispersion, extinction, and cladogenesis. Although processes such as the appearance of  
45 novel traits, interspecific competition, and colonization of new environments might lead to a  
46 single burst of range size change, in many cases species distributions are dynamic over time,  
47 oscillating between periods of range contraction followed by expansion (Davis & Shaw, 2001;  
48 Taberlet & Cheddadi, 2002; Carnaval & Moritz, 2008). Range expansions are expected to be  
49 accompanied by a rapid increase in the number of individuals, and strong spatial directionality  
50 (Excoffier et al., 2009). At the expansion front, successive founder events lead to a fast  
51 differentiation from the source, producing a characteristic demographic signature that is  
52 distinguishable from non-spatial population growth (Excoffier et al., 2009; François et al., 2010;  
53 Peter & Slatkin, 2013; Alvarado-Serrano & Hickerson, 2018). By tracking the spatial dynamics  
54 of populations one can locate zones of climatic stability (Potter et al., 2016), track sources of  
55 population invasions (Fischer et al., 2017), and understand how genetic diversity was affected by  
56 past environmental changes (Reid et al., 2019), allowing for more robust predictions to explore  
57 classical diversification hypotheses.

58 One of the main processes used by phylogeographic approaches to explain population  
59 size changes through time is the variation on available habitat distribution due to vegetation  
60 response to historical climate change, as described by the refugia hypothesis (Haffer, 1969, 1997;

61 Hewitt, 2004). This mechanism suggests that populations tend to be isolated in "islands" of  
62 optimum habitats during glacial (e.g., lowland forest taxa) or interglacial (e.g., montane forest  
63 taxa) periods followed by population expansion and secondary contact as habitats expand. In the  
64 Neotropics, the region for which the refugia hypothesis was initially proposed (Haffer, 1969), the  
65 effects of past climatic oscillations have been used to explain patterns of genetic diversity in  
66 multiple environments, including the Atlantic Forest (Carnaval et al., 2009; Amaral et al., 2018;  
67 Silva et al., 2019), Amazonia (Thom et al., 2020b), Caatinga (Gehara et al., 2017), the Chaco dry  
68 forests (Camps et al., 2018) and the Andes/Patagonia (Cosacov et al., 2010). However, few  
69 studies have sought to understand if demographic patterns are linked to range size change  
70 (Camargo et al., 2013; Guarnizo et al., 2016; Baranzelli et al., 2017). By testing models  
71 including range expansions, one can explicitly explore alternative hypotheses regarding the  
72 location of putative stable habitats through time, providing a better understanding of the  
73 historical dynamic of specific environments (Potter et al., 2016; He et al., 2017; Reid et al.,  
74 2019).

75 In the Amazon floodplains, historical variation in precipitation and global sea-level  
76 affected sedimentation dynamics of the main rivers (Latrubesse & Franzinelli, 2005; Irion et al.,  
77 2009; Soares et al., 2010; Pupim et al., 2019), potentially shaping the distribution and  
78 connectivity of populations occurring on river-created environments (Aleixo, 2006; Choueri et  
79 al., 2017; Thom et al., 2020b). Phylogeographic studies have reported demographic expansions  
80 for populations of birds specialized in river islands, suggesting widespread habitat alterations  
81 across the entire Amazon river system (Aleixo, 2006; Thom et al., 2020b). Historical oscillations  
82 in the availability of floodplain environments tend to be more pronounced in regions where large  
83 tributaries with distinct sediment loads meet (Gualtieri et al., 2018). For instance, the confluence  
84 of the Negro (low sediment load) and Solimoes rivers (high sediment load) leads to an increase  
85 in the water discharge and dilution of sediment concentration of the main Amazon river channel,  
86 promoting erosion and sediment bypass (Thom et al., 2020b). The current dynamics between  
87 Negro and Solimoes rivers prevent the building of long-lasting substrates for flooded habitats  
88 downstream of the confluence for approximately 150 km, until the high sediment input of the  
89 Madeira River, which restores suitable conditions for the development of large and stable  
90 floodplains in the main channel of the Amazon river (Filizola & Guyot, 2009). Recent

91 phylogeographic studies suggest that the central portion of the Amazon Basin, between the  
92 Negro and Madeira rivers, is indeed a suture zone, partially or completely isolating recently  
93 diverged populations, mostly restricted to Solimoes, Negro, Madeira, and lower Amazonas rivers  
94 (Choueri et al., 2017; Thom et al., 2018, 2020b). This spatial congruence indicates that fluvial  
95 sedimentation dynamics may directly influence the connectivity of species occurring in river-  
96 created environments along Amazonian floodplains through time.

97         The historical interaction between the sediment-poor Negro River and the sediment-rich  
98 Solimões-Amazonas main channel, mediated by past oscillations in precipitation and sea level,  
99 may have been dynamic over time, shaping the availability of flooded habitats in central  
100 Amazonia. For example, the Negro River is currently impacted by a damming effect caused by  
101 the larger water input from the Solimões-Amazonas River, maintaining a ria lake at its lower  
102 section, which prevents island formation and creates a barrier for the biota associated with river-  
103 created habitats (Choueri et al., 2017). Similarly, past increases in the Negro River discharge  
104 could have periodically affected the flooding pulse of the Solimões (Irion et al., 2009; Passos et  
105 al., 2020), causing suppression of seasonally flooded habitats from its lower and middle sections  
106 (Latrubesse & Franzinelli, 2005; Soares et al., 2010; Passos et al., 2020). Under this scenario, we  
107 expect seasonally flooded habitats in the upper Solimões River to be historically more stable than  
108 areas closer to the Negro River confluence (lower Solimoes River). Hence, the demographic  
109 expansions detected by previous studies for populations of birds (Thom et al., 2020b) would be  
110 linked to recent range expansions from the upper/middle towards the lower sections of the  
111 Solimoes River. This demographic process should lead to higher genetic diversity on upriver  
112 populations, and if this was a pervasive mechanism, we expect to detect the same pattern in co-  
113 occurring populations that occupy similar habitats. Alternatively, population demographic  
114 expansions could be related to geographic homogeneous oscillation in habitat availability (e.g.,  
115 oscillations in the carrying capacity of the environments). Under this scenario, we expect the  
116 genetic diversity to be mostly explained by the geographic distance between individuals  
117 (Isolation by distance), with a relatively homogeneous distribution of the genetic diversity across  
118 the whole extension of the Solimoes River, or governed by species-specific characteristics. In the  
119 latter, species would have variable patterns across space, potentially associated with habitat  
120 specificity.

121 The Amazon floodplains are an intricate mosaic of microhabitats that roughly segregate  
122 with the sedimentary dynamic of the rivers and the geographic distance from the main channel  
123 (Junk et al., 2012, 2015). Areas next to the margins or on islands of rivers with high sedimentary  
124 budgets as the Solimoes, tend to be more dynamic over time, keeping vegetation in early  
125 successional stages of regeneration due to the constant erosion and sedimentation. Given the high  
126 diversity of microhabitats along the floodplains, we might expect that species with higher  
127 dependence on more dynamic environments should have been more affected by historical  
128 changes on the floodplains, having a more heterogeneous spatial distribution of genetic diversity.  
129 In this case, higher association to more dynamic habitats should predict spatial levels of genetic  
130 diversity.

131 We explored the levels of connectivity and the spatial distribution of the genetic diversity  
132 of three antbird species, *Myrmoborus lugubris*, *Thamnophilus cryptoleucus*, and *Myrmotherula*  
133 *assimilis* with populations restricted to the Solimões River, testing if the population demographic  
134 expansions reported in a previous study (Thom et al., 2020b) are related to range expansions  
135 following a period of isolation in the upper/middle course of this river. We reanalyzed the data  
136 published by Thom and collaborators (2020b) using a set of methods designed to track  
137 population range expansions and explore how genetic diversity is distributed across space. Our  
138 results refute the idea of congruent range shifts related to historical regionalized changes in  
139 habitat availability. Instead, our data suggest that demographic expansions along the Solimões  
140 floodplains might be associated with variation in habitat availability across the entire range of the  
141 species, promoting effective population size changes but not range expansion. We found that  
142 species with higher levels of specialization to dynamic environments have a more heterogeneous  
143 distribution of genetic diversity and reduced levels of gene flow across space, indicating that  
144 habitat specificity might be a good predictor of population connectivity along the Amazonian  
145 floodplains.

146

## 147 **Material and Methods**

148 We selected samples from the Solimões River populations of *Myrmoborus lugubris* (N =  
149 31), *Thamnophilus cryptoleucus* (N = 20), and *Myrmotherula assimilis* (N = 16) that were  
150 previously analyzed by Thom et. al (2020b; Figure 1; Table S1). Genome-wide variation was

151 obtained through the sequence capture of Ultraconserved Elements (UCEs) using a probe set  
152 targeting 2,312 UCE loci and 97 additional probes targeting exons commonly used in Avian  
153 phylogenomic studies (Hackett et al., 2008; Kimball et al., 2009; Faircloth et al., 2012). Raw  
154 sequences were downloaded from the Sequence Read Archive (SRA; BioProject ID:  
155 PRJNA595086; SubmissionID: SUB6206537; [www.ncbi.nlm.nih.gov/bioproject/595086](http://www.ncbi.nlm.nih.gov/bioproject/595086)). We  
156 used Trinity 2.4 (Grabherr et al., 2011) to assemble *de novo* reads into contigs. The contigs were  
157 matched to the probes with LASTZ (<http://www.bx.psu.edu/~rsharris/lastz/>) using  
158 “match\_contigs\_to\_probes.py” from PHYLUCE (Faircloth et al., 2012; Faircloth, 2016). Contigs  
159 that did not align to probe sequences and those that matched multiple loci were removed. The  
160 resulting fasta files from the different individuals were aligned in MAFFT v7.475 (Katoh &  
161 Standley, 2013), allowing for missing individuals and without trimming long ragged-ends. These  
162 long ragged-ends were then trimmed by applying a threshold of 50% of missing sequences  
163 among individuals with TrimAl v1.4.rev15 (Capella-Gutierrez et al., 2009). The longest  
164 sequence without indels of each locus was selected as a reference for the following steps. First,  
165 reads of each individual were aligned to the reference allowing 4 mismatches per read using  
166 BWA v0.7.17-r1188 (Li & Durbin, 2009). The sam files obtained were converted to bam format  
167 with Samtools v1.10 (Li et al., 2009). Reads were trimmed to match the reference using  
168 CleanSam.jar, reassigned to groups with AddOrReplaceReadGroups.jar, and duplicated reads  
169 were identified with Markduplicates.jar from PICARD v.2.0.1 (Broad Institute, Cambridge, MA;  
170 <http://broadinstitute.github.io/picard/>). We merged individual bam files into a single bam file of  
171 all samples with MergeSamFiles.jar from PICARD. With GATK v3.6 (McKenna et al., 2010) we  
172 realigned all reads, identified indels (RealignerTargetCreator; IndelRealigner), and called SNPs  
173 hard-masking low-quality bases (< Q30) with UnifiedGenotyper and VariantAnnotator. We  
174 obtained raw vcf files for each species that were filtered for a minimum read depth of > 8 using  
175 VCFTOOLS v0.1.15 (Danecek et al., 2011). Loci with any site with heterozygosity higher than  
176 0.75 were excluded. Finally, we randomly selected one SNP per locus, excluding sites with  
177 missing data, resulting in a complete SNP matrix.

178

### 179 *Genetic Structure*

180 We tested the best-fit number of ancestral populations (k) for each species complex and

181 clustered individuals to populations in sNMF v1.2 (Frichot et al., 2014) by applying a sparse  
182 non-negative matrix factorization to compute least-square estimates of ancestry coefficients. We  
183 explored values of  $k$  between 1 and 8 and performed 100 replicates for each value with an alpha  
184 regularization parameter of 100. Given that populations occurring in linear and continuous  
185 environments such as rivers are more subjected to the effects of the geographic distance among  
186 individuals, and that IBD can generate discrete genetic clusters (Thomaz et al., 2016), we tested  
187 genetic structure controlling for the effects of IBD in the R package conStruct v1.0.3 (Bradburd  
188 et al., 2018). ConStruct simultaneously estimate continuous and discrete patterns of population  
189 structure by assuming a rate of decay in the relatedness among individuals as a function of the  
190 geographic distance. Thus, discrete groups are only assumed when genetic variation significantly  
191 deviates from an IBD scenario. We ran models assuming the same number of layers as the  
192 number of ancestral populations obtained in the best sNMF model and calculated the relative  
193 layer contribution with the function “calculate.layer.contribution”, in order to observe if the  
194 genetic structure inferred by sNMF could be explained exclusively by IBD. For each conStruct  
195 run, we performed 50,000 iterations discarding the first 50% as burn-in. We calculated the  
196 geographic distance matrices for each species following river connectivity.

197

### 198 *Isolation by distance, effective diversity, and gene flow*

199 We identified spatial variation in gene flow among localities and tested deviations from  
200 isolation by distance (IBD) scenario for each species with EEMS (Petkova et al., 2016). EEMS  
201 estimates the effective migration surface among drawn demes mapping genetic differentiation  
202 based on a spatially explicit approach by using a Markov Chain Monte Carlo (MCMC) to  
203 estimate effective demographic parameters given the observed genetic dissimilarity between  
204 individuals. Euclidian genetic dissimilarity matrices between individuals for each species  
205 complex were generated in ADEGENET v2.1.3 (Jombart & Ahmed, 2011). Habitat polygons  
206 were produced based on the geographic distribution of each species complex and 300 demes  
207 were distributed over the habitat area. Each MCMC run was performed for  $30 \times 10^6$  generations  
208 with the first  $5 \times 10^6$  generations excluded as burn-in. Maps were generated using additional  
209 features of the EEMS R package. We calculated the inbreeding coefficient ( $F$ ) per individual in  
210 VCFTOOLS and interpolated the obtained values across the species distribution in QGIS

211 (<https://www.qgis.org/>). Additionally, to test IBD we performed a Mantel correlation test  
212 between genetic and geographic distances in ADEGENET with 999 replicates.

213

#### 214 *Geographic range expansion*

215 We tested for population range expansion using two alternative approaches, first  
216 estimating the directionality index using rangeExpansion v0.0.0.9 in R (Peter & Slatkin, 2013,  
217 2015) and second, estimating the geographic spectrum of shared alleles in the GSSA v0.0  
218 program (Alvarado-Serrano & Hickerson, 2018). The rangeExpansion applies a founder effect  
219 algorithm assuming a stepping stone model of population expansion from a single location,  
220 testing the strength of the spatial expansion and the most likely origin of the founder effect,  
221 measuring the effective founder distance. The effective founder distance represents the size of  
222 the deme in which the effective population size is reduced by 1% during the founder event  
223 occurring in the expansion front. Thus, low values for the effective founder distance suggest a  
224 strong founder effect. For this approach, in order to calculate the derived state of each SNP, we  
225 assumed as outgroup one individual from a closely related population (Thom et al., 2020b).

226 The GSSA (Alvarado-Serrano & Hickerson, 2018) captures the range expansion signal  
227 by summarizing the shared co-ancestry between sampled localities. This statistic consists of  
228 estimating the absolute number of minor alleles shared between sampled localities, taking into  
229 account the geographic distance between localities. Given that the amount of genetic drift  
230 increases with the distance to the founder event (source of the expansion), the obtained per  
231 locality histograms contain information regarding the position of a given locality with respect to  
232 the source of the geographic expansion. Some advantages of the GSSA are that no outgroup  
233 needs to be used and it can handle less geographic dense sampling when compared to the  
234 rangeExpansion method. GSSA implementation allows for the user to provide a geographic  
235 distance matrix, instead of assuming linear distances from geographic coordinates. Given the  
236 intimate relationship of the studied species with the floodplains, we calculated the geographic  
237 distance matrixes for each species following the river's connectivity. The information contained  
238 in the shape of the GSSA histogram was summarized using Harpending's raggedness index  
239 (Harpending, 1994) and the obtained values per locality were interpolated across the distribution  
240 of each species in QGIS. We expect that locations further away from the expansion source share



241 more genetic variants with nearby locations that were colonized through the same expansion  
242 route, and thus have higher values for the Harpending's raggedness index. For both analyses, we  
243 selected a single individual per locality with the lowest amount of missing data.

244

#### 245 *Habitat occupancy and river dynamism*

246 To quantify differences in habitat occupation between the three species that could predict  
247 the spatial patterns of genetic diversity we used a metric of river dynamism extracted from the  
248 Occurrence Change Intensity Map available at <https://global-surface-water.appspot.com/> (Pekel  
249 et al., 2016). This layer contains information on whether the water surface increased (e.g.  
250 erosion) or decreased (e.g. deposition of sediments) around bodies of water, and its intensity  
251 based on both the intra and inter-annual variability and changes, extracted from Landsat satellite  
252 images between 1984 and 2019. On this layer, values range from -100 to 100, where negative  
253 values represent a loss of water surface, positive values represent an increase of water surface,  
254 and zero represent stable water surfaces. To calculate the dynamicity of a radius around  
255 occurrence records for the studied species, we: 1) converted negative values to positive, so both  
256 gain and loss represent how much a given pixel has changed over time; 2) drew a buffer of 2km  
257 around every stable body of water, removing areas that were permanently water across the  
258 analyzed time section; 3) used random drawn points and occurrence records for the three species  
259 to calculate average values of dynamicity using a 1000 meters radius around the coordinates. To  
260 create the random distribution we draw 1000 points across the floodplains of the Solimoes Basin.  
261 We plotted the values for dynamicity and calculated pairwise Wilcoxon tests in R, to explore if  
262 values extracted from random points and each species statistically differ. Spatial layers were  
263 processed using the raster v3.4 in R (Hijmans & van Etten, 2013). Occurrence records were  
264 obtained from video, photos, and sound recordings from Macaulay Library  
265 ([www.macaulaylibrary.org](http://www.macaulaylibrary.org)) and Xeno-canto ([www.xeno-canto.org](http://www.xeno-canto.org)), and deposited specimens on  
266 scientific collections (Table S2). Each record was individually checked, and records with a  
267 generic locality description or low-resolution coordinates were excluded. Occurrences at the  
268 same locality and date were counted only once. Geographic coordinates outside the 2km buffer  
269 were moved to the closest pixel within the buffer.

270

## 271 Results

272 Our bioinformatics pipeline produced raw vcf files with 5,602 (16.8 mean depth; 2.8 sites  
273 per loci), 10,624 (28.4 mean depth; 4.7 sites per loci), and 10,283 (19.9 mean depth; 7.1 sites per  
274 loci) variant sites for *M. lugubris*, *T. cryptoleucus*, and *M. assimilis*, respectively. After randomly  
275 selecting one SNP per UCE loci we obtained matrices with 1,476, 1,805, and 1,776 SNPs for *M.*  
276 *lugubris*, *T. cryptoleucus*, and *M. assimilis*, respectively. The number of genetic clusters obtained  
277 with sNMF was partially concordant between species. For *M. lugubris* and *T. cryptoleucus*, the  
278 best value of masked cross-entropy was achieved with K=2 while for *M. assimilis* the best value  
279 suggested K=1 (Figure 2, S1). However, the results for K=2 for *M. assimilis* recovered a similar  
280 geographic structure as the ones observed in the other two species, with a gradual transition over  
281 the central portion of the Solimões basin (Figure 2). For *T. cryptoleucus* and *M. assimilis*, this  
282 transition in the ancestry coefficients occurred between Tefé and Codajas (localities 9 to 11 in  
283 Figure 1) while for *M. lugubris* it occurred more to the west, at Santo Antonio do Ica (locality 6  
284 in Figure 1). When accounting for geographic distance with conStruct, assuming 2 layers, the  
285 relative contribution of the second layer was less than 1% and without geographic  
286 correspondence in all three species. These results suggest that the genetic structure obtained with  
287 sNMF is better explained by isolation by distance (IBD).

288 The EEMS detected slightly lower effective migration than the average in the eastern  
289 Solimões basin, suggesting progressively more dissimilar individuals towards the east in all three  
290 species (Figure 2). However, the estimated effective diversity produced contrasting results  
291 between species. While for *M. lugubris* we detected lower diversity in eastern localities, for *T.*  
292 *cryptoleucus* there was considerably lower diversity in western localities, and for *M. assimilis* we  
293 found a relatively homogeneous distribution of genetic diversity (Figures S2, S3). The results for  
294 a Mantel test were congruent with EEMS analyses, significantly supporting an IBD scenario in  
295 all three species (p-value < 0.01; Mantel r statistics of 0.59, 0.45, and 0.74 for *M. lugubris*, *T.*  
296 *cryptoleucus*, and *M. assimilis*, respectively). The inbreeding coefficient indicated a similar  
297 scenario as reported by EEMS effective diversity results for *M. lugubris* and *M. assimilis*, and a  
298 homogeneous distribution for *T. cryptoleucus* (Figure S4).

299 The geographic expansion model was strongly supported over an equilibrium/IBD model  
300 in the rangeExpansion analysis only for *T. cryptoleucus* (p-value < 0.001; q = 0.0004; Table 1;

301 Figure S5) indicating a geographic expansion from western Solimões. For *M. lugubris* and *M.*  
302 *assimilis* the equilibrium/IBD model could not be rejected (p-value of 36.17 and 0.86 for *M.*  
303 *lugubris* and *M. assimilis*, respectively). The GSSA estimations support a geographic  
304 directionality for the raggedness index in *M. lugubris*, with lower values in the eastern and  
305 higher values in the western Solimões as suggested by the rangeExpansion (despite the non-  
306 significant p-value; Figure 3). For *T. cryptoleucus*, despite the significant results in the  
307 rangeExpansion, there is no geographic signal supporting a range expansion using the GSSA.

308 Data processing of occurrence records produced 60, 92, and 44 points for *M. lugubris*, *T.*  
309 *cryptoleucus*, and *M. assimilis*, respectively. The pairwise Wilcoxon tests indicated that all three  
310 species occupy areas that are more dynamic than randomly drawn points, with *M. lugubris* and  
311 *T. cryptoleucus* occurring in areas significantly more dynamic than *M. assimilis* (Figure 4).

312

## 313 Discussion

### 314 *Demographic histories are not linked to a shared pattern of range expansion*

315 We used the genetic variation within thousands of Ultraconserved Elements to explore  
316 spatial patterns of genetic diversity in three species of antbirds that inhabit river-created  
317 environments along the Solimões River. Previous studies suggested that populations of these  
318 three species experienced synchronic demographic expansions in the last 0.2 million years ago  
319 (Thom et al., 2020b). Here we tested if demographic expansions were linked to geographic range  
320 expansions associated with historical alteration in the distribution of river-created environments  
321 (Latrubesse & Franzinelli, 2005; Irion et al., 2009; Soares et al., 2010; Govin et al., 2013; Pupim  
322 et al., 2019). Our results supported that only one species, *T. cryptoleucus*, had a significant range  
323 expansion with geographic origin in the western Solimoes River. The spatial distribution of the  
324 genetic diversity reported here refutes historical events triggering common regionalized changes  
325 in population ranges along the Solimoes River. Our results suggest that despite the high  
326 dynamism of floodplain environments over time, significant regional suppression of seasonally  
327 flooded habitats was probably restricted to specific portions of the floodplains. For example, the  
328 central portion of the Amazon, where the sedimentary basin of the Solimões River flows into the  
329 eastern Amazon basin, delimits the distribution of many floodplain lineages and is a suture zone  
330 splitting populations and species with distinct levels of genetic structure and gene flow (Farias &

331 Hrbek, 2008; Albernaz et al., 2012; Zimmer & Isler, 2016; Thom et al., 2020b). Hence, the  
332 demographic expansions reported by Thom and collaborators (2020) might be related to  
333 homogeneous oscillations in habitat availability across the entire geographic distribution of the  
334 populations, promoting population size changes but not directional range contractions and  
335 expansions.

336

### 337 *Genetic diversity is heterogeneously distributed across the Solimoes floodplains*

338 We observed species-specific patterns for the spatial distribution of genetic diversity  
339 along the Solimões River, potentially associated with variation in the occupancy of dynamic  
340 habitats (Figures 2, S2, S3, S4). The antbird species studied here are intimately related to the  
341 river edge forests that are mostly distributed over islands of large rivers (Remsen & Parker,  
342 1983; Junk et al., 2011). Given the low dispersal capacity of the studied species (Zimmer & Isler,  
343 2016) and the historical dynamism of river islands, one might expect a shared pattern of genetic  
344 diversity between species. However, our data do not support this scenario, with the three species  
345 having different patterns of the spatial distribution of their genetic diversity. Despite occupying  
346 similar environments, our data suggest that species differ in their levels of association to  
347 dynamic habitats. We found that species occurring in significantly more dynamic areas have  
348 higher inbreeding coefficients, more heterogeneous spatial distribution of genetic diversity, and  
349 more variable levels of effective gene flow across space. These results indicated that habitat  
350 specificity might predict the spatial connectivity of floodplain species. Despite the congruency in  
351 historical demography, reported in previous studies (Thom et al., 2020b), our results suggest a  
352 pronounced effect of intrinsic ecological traits leading to distinct dispersal capacities affecting  
353 the spatial distribution of the genetic diversity within populations.

354 Heterogeneous patterns of genetic diversity have been reported along the Amazonian  
355 floodplains (Choueri et al., 2017; Jardim de Queiroz et al., 2017; dos Anjos Oliveira et al., 2019;  
356 Farias et al., 2019). Choueri and collaborators (2017) studying landscape genetics of river island  
357 specialist birds found that genetic diversity over Negro River archipelagos is not homogeneously  
358 distributed and that the temporal dynamics of formation and disappearance of islands shaped the  
359 genetic structure and gene flow between populations. Additionally, these authors suggest that the  
360 increase in sediment accumulation and island formation during the Holocene expanded

361 connectivity between archipelagos (Latrubesse & Franzinelli, 2005; Latrubesse & Stevaux, 2015;  
362 Choueri et al., 2017). However, in contrast to the demography of Solimões River populations,  
363 only slight signals of expansion were detected for the Negro River populations, corroborating the  
364 idea that rivers with black and clear water (sediment-poor) are less dynamic over time than  
365 white-water rivers (sediment-rich rivers), such as the Solimões (Thom et al., 2020b).

366 The patterns of genetic structure we detected with sNMF (K=2) were likely a product of  
367 the strong effects of IBD in linear distributions, as observed in the conStruct analyses, which  
368 suggested a minor contribution of a second layer (K) to explain the genetic structure. These  
369 results are in agreement with simulation-based, and empirical studies reporting the high effect of  
370 IBD in the linear distribution of river systems, including the formation of differentiated lineages  
371 (Selkoe et al., 2015; Thomaz et al., 2016; Farias et al., 2019). However, studies have suggested  
372 that the riverway distance plays a minor role in structuring genetic diversity of floodplain  
373 populations across the entire Amazonian Basin, suggesting the more pronounced effect of other  
374 environmental features (Hrbek et al., 2005; dos Anjos Oliveira et al., 2019; Thom et al., 2020b).  
375 Our results reinforce the idea that IBD has to be taken into account when testing for genetic  
376 structure in continuous populations on the risk of assuming spurious discrete populations in  
377 downstream population genetics analyses.

378

### 379 *Future directions to explore spatial patterns of genetic diversity across the Amazonian* 380 *floodplains*

381 Our study provided new insights on the spatial dynamics of floodplain forest  
382 environments over time, refuting a pattern of common range expansion for co-occurring species.  
383 However, our data is limited in the sense that more sampled localities could improve our power  
384 in detecting range size changes. Although studies have reported robust results with the  
385 rangeExpansion method (Peter & Slatkin, 2013) sampling a single diploid individual for 10  
386 localities and 1,500 SNPs, which is a data set similar to ours, the ideal data set lies around 20  
387 diploid individuals (1 per locality) and 7,000 SNPs (Peter & Slatkin, 2013, 2015; Potter et al.,  
388 2016). An important factor that might hinder our ability to detect if a range expansion occurred is  
389 the time since populations reached a stationary condition (Alvarado-Serrano & Hickerson, 2018).  
390 All three species we analyzed have extensive distributions across the Solimões River, and might

391 already have reached isolation by distance equilibrium, eroding the signal for directional range  
392 expansions. Recent evidence has supported that secondary contact and gene flow are pervasive  
393 processes across the floodplains, although controlled by varying degrees of connectivity through  
394 time (Thom et al., 2018, 2020b). The methods we applied do not incorporate the effects of gene  
395 flow from unsampled populations, which could inflate genetic diversity in eastern Solimões  
396 localities, masking the genomic signal of range expansions. The inferred range expansion in *T.*  
397 *cryptoleucus* pointed to an interesting scenario, since this taxon is currently in contact with *T.*  
398 *nigrocinereus tshudi* from the Madeira River, suggesting diversification in allopatry followed  
399 by range expansion and recent secondary contact. These results suggest that the approach we  
400 used might be robust to some level of gene flow from distinct populations. Future studies aiming  
401 to explore the spatial demographic dynamics of floodplain populations should target widespread  
402 geographic distribution of samples (e.g. one individual per locality and many localities), and  
403 more genetic markers, obtained with reduced representation techniques such as RADseq  
404 (Andrews et al., 2016), or whole-genome sequencing (Ellegren, 2014). Additionally, spatial  
405 explicit simulations of demographic histories coupled with supervised machine learning  
406 classification algorithms could improve our ability to test range size changes through time with a  
407 reduced number of samples ([Battey et al. 2020](#); [Reid et al. 2019](#)).

408 Ecological niche modeling has been used to track the current and paleo distribution of  
409 various Amazonian organisms (Prates et al., 2016; dos Anjos Oliveira et al., 2019; Silva et al.,  
410 2019). However, the intimate relationship of floodplain species with microhabitats linked to the  
411 sedimentation dynamics of the rivers, probably cannot be captured by interpolated bioclimatic  
412 variables (e.g. Worldclim). Meaningful variables that could describe the sedimentation process  
413 and detailed distribution of floodplain habitats with a good resolution for the entire Basin are  
414 becoming available (Pekel et al., 2016; Fassoni-Andrade & Paiva, 2019) and might provide new  
415 insights on how the current sediment budget of rivers and vegetation dynamics shape patterns of  
416 genetic diversity. Amazonia is currently at the center of the debate about the impact of  
417 hydroelectric dams on biodiversity and the sedimentary budget of rivers (Latrubesse et al., 2017).  
418 Understanding how the genetic diversity (dos Anjos Oliveira et al., 2019) and species richness  
419 (Laranjeiras et al., 2021) might be associated with river dynamism and productivity is paramount  
420 to predict future impacts caused by anthropic activities.

421

## 422 **Acknowledgments**

423 We thank the curatorial staff of the Museu Paraense Emílio Goeldi (MPEG), Instituto Nacional  
424 de Pesquisas da Amazônia (INPA), Laboratório de Genética e Evolução Molecular de Aves  
425 (LGEMA) for loaning tissue samples under their care. We thank members of the Smith lab,  
426 Hickerson lab, and Carnaval lab: Brian Smith, Kaiya L. Provost, Lucas R. Moreira, Vivien Chua,  
427 Jon Merwin, Ana C. Carnaval, Connor French, Andrea Paz, Kathryn Mercier, Rilquer  
428 Mascarenhas, Lidia Martins, Michael Hickerson, Isaac Overcast, Alexander Xue. We thank L. E.  
429 Araujo-Silva for the partnership during field expeditions. We thank Oscar Johnson and Rob  
430 Brumfield for sharing UCE sequences. We thank the Research Center on Biodiversity and  
431 Computing (BioComp) of the Universidade de São Paulo (USP), supported by the USP Provost's  
432 Office for Research. This study was co-funded by FAPESP (BIOTA, 2012/50260-6 and  
433 2013/50297-0), NSF (DOB 1343578), NASA, CNPq (310593/2009-3, 574008/2008-0,  
434 563236/2010-8, and 471342/2011-4), PEER/USAID (AID-OAA-A-11-00012), and FAPESPA  
435 (ICAAF 023/2011). G.T. was granted by CAPES and then FAPESP scholarships (2014/00113-2,  
436 2015/12551-7, 2018/17869-3, and 2017/25720-7). A.A., C.C.R., and C.M. are supported by  
437 CNPq research productivity fellowships (310880/2012-2, 308927/2016-8, and 3062204/2019-3).

438

## 439 **Biosketch**

440 **Gregory Thom** is broadly interested in comparative genomics, testing the major factors  
441 impacting population differentiation over historical timescales. His overriding goal is to unearth  
442 the mechanisms driving Neotropical bird evolution by using genomics and advanced  
443 computational biology.

444

## 445 **Author contributions**

446 G.T. conceived the study and performed bioinformatics and phylogeographic analyses. G.T.,  
447 C.C.R., and C.M. wrote the paper with input from A.A. and ES. GT and ES performed the river  
448 dynamicity analyses. All authors reviewed and approved the final version of the manuscript  
449 before submission.

450

## 451 References

- 452 Albernaz, A.L., Pressey, R.L., Costa, L.R.F., Moreira, M.P., Ramos, J.F., Assunção, P.A., &  
453 Franciscan, C.H. (2012) Tree species compositional change and conservation implications  
454 in the white-water flooded forests of the Brazilian Amazon: Compositional patterns of  
455 floodplain tree species. *Journal of Biogeography*, **39**, 869–883.
- 456 Aleixo, A. (2006) Historical diversification of floodplain forest specialist species in the Amazon:  
457 a case study with two species of the avian genus *Xiphorhynchus* (Aves: Dendrocolaptidae).  
458 *Biological journal of the Linnean Society. Linnean Society of London*, **89**, 383–395.
- 459 Alvarado-Serrano, D.F. & Hickerson, M.J. (2018) Detecting spatial dynamics of range  
460 expansions with geo-referenced genomewide SNP data and the geographic spectrum of  
461 shared alleles. *bioRxiv*, .
- 462 Alves, J.A., Gunnarsson, T.G., Sutherland, W.J., Potts, P.M., & Gill, J.A. (2019) Linking  
463 warming effects on phenology, demography, and range expansion in a migratory bird  
464 population. *Ecology and Evolution*, **9**, 2365–2375.
- 465 Amaral, F.R., Alvarado-Serrano, D.F., Maldonado-Coelho, M., Pellegrino, K.C.M., Miyaki,  
466 C.Y., Montesanti, J.A.C., Lima-Ribeiro, M.S., Hickerson, M.J., & Thom, G. (2018) Climate  
467 explains recent population divergence, introgression and persistence in tropical mountains:  
468 phylogenomic evidence from Atlantic Forest warbling finches. *bioRxiv*, 439265.
- 469 Andrews, K.R., Good, J.M., Miller, M.R., Luikart, G., & Hohenlohe, P.A. (2016) Harnessing the  
470 power of RADseq for ecological and evolutionary genomics. *Nature Reviews. Genetics*, **17**,  
471 81–92.
- 472 dos Anjos Oliveira, J., Farias, I.P., Costa, G.C., & Werneck, F.P. (2019) Model-based riverscape  
473 genetics: disentangling the roles of local and connectivity factors in shaping spatial genetic  
474 patterns of two Amazonian turtles with different dispersal abilities. *Evolutionary Ecology*,  
475 **33**, 273–298.
- 476 Araújo, M.B. & Luoto, M. (2007) The importance of biotic interactions for modelling species  
477 distributions under climate change. *Global Ecology and Biogeography: a Journal of*  
478 *Macroecology*, **16**, 743–753.
- 479 Baranzelli, M.C., Cosacov, A., Ferreiro, G., Johnson, L.A., & Sérsic, A.N. (2017) Travelling to  
480 the south: Phylogeographic spatial diffusion model in *Monttea aphylla* (Plantaginaceae), an  
481 endemic plant of the Monte Desert. *PloS One*, **12**, e0178827.
- 482 Battey, C.J., Ralph, P.L., & Kern, A.D. (2020) Space is the place: effects of continuous spatial  
483 structure on analysis of population genetic data. *Genetics*, **215**, 193–214.
- 484 Bradburd, G.S., Coop, G.M., & Ralph, P.L. (2018) Inferring continuous and discrete population



- 485 genetic structure across space. *Genetics*, **210**, 33–52.
- 486 Camargo, A., Werneck, F.P., Morando, M., Sites, J.W., & Avila, L.J. (2013) Quaternary range  
487 and demographic expansion of *Liolaemus darwini* (Squamata: Liolaemidae) in the Monte  
488 Desert of Central Argentina using Bayesian phylogeography and ecological niche  
489 modelling. *Molecular Ecology*, **22**, 4038–4054.
- 490 Camps, G.A., Martínez-Meyer, E., Verga, A.R., Sérsic, A.N., & Cosacov, A. (2018) Genetic and  
491 climatic approaches reveal effects of Pleistocene refugia and climatic stability in an old  
492 giant of the Neotropical Dry Forest. *Biological Journal of the Linnean Society*, **125**, 401–  
493 420.
- 494 Capella-Gutierrez, S., Silla-Martinez, J.M., & Gabaldon, T. (2009) trimAl: a tool for automated  
495 alignment trimming in large-scale phylogenetic analyses. *Bioinformatics*, **25**, 1972–1973.
- 496 Carnaval, A.C., Hickerson, M.J., Haddad, C.F.B., Rodrigues, M.T., & Moritz, C. (2009) Stability  
497 predicts genetic diversity in the Brazilian Atlantic forest hotspot. *Science*, **323**, 785–789.
- 498 Carnaval, A.C. & Moritz, C. (2008) Historical climate modelling predicts patterns of current  
499 biodiversity in the Brazilian Atlantic forest. *Journal of Biogeography*, **35**, 1187–1201.
- 500 Choueri, É.L., Gubili, C., Borges, S.H., Thom, G., Sawakuchi, A.O., Soares, E.A.A., & Ribas,  
501 C.C. (2017) Phylogeography and population dynamics of Antbirds (Thamnophilidae) from  
502 Amazonian fluvial islands. *Journal of Biogeography*, **44**, 2284–2294.
- 503 Cosacov, A., Sérsic, A.N., Sosa, V., Johnson, L.A., & Cocucci, A.A. (2010) Multiple periglacial  
504 refugia in the Patagonian steppe and post-glacial colonization of the Andes: the  
505 phylogeography of *Calceolaria polyrhiza*: Phylogeography of *Calceolaria polyrhiza*.  
506 *Journal of Biogeography*, no–no.
- 507 Danecek, P., Auton, A., Abecasis, G., Albers, C.A., Banks, E., DePristo, M.A., Handsaker, R.E.,  
508 Lunter, G., Marth, G.T., Sherry, S.T., McVean, G., Durbin, R., & 1000 genomes project  
509 analysis group (2011) The variant call format and VCFtools. *Bioinformatics*, **27**, 2156–  
510 2158.
- 511 Davis, M.B. & Shaw, R.G. (2001) Range shifts and adaptive responses to Quaternary climate  
512 change. *Science*, **292**, 673–679.
- 513 Ellegren, H. (2014) Genome sequencing and population genomics in non-model organisms.  
514 *Trends in Ecology & Evolution*, **29**, 51–63.
- 515 Excoffier, L., Foll, M., & Petit, R.J. (2009) Genetic consequences of range expansions. *Annual*  
516 *Review of Ecology, Evolution, and Systematics*, **40**, 481–501.
- 517 Faircloth, B.C. (2016) PHYLUCE is a software package for the analysis of conserved genomic  
518 loci. *Bioinformatics*, **32**, 786–788.

- 519 Faircloth, B.C., McCormack, J.E., Crawford, N.G., Harvey, M.G., Brumfield, R.T., & Glenn,  
520 T.C. (2012) Ultraconserved elements anchor thousands of genetic markers spanning  
521 multiple evolutionary timescales. *Systematic Biology*, **61**, 717–726.
- 522 Farias, I.P. & Hrbek, T. (2008) Patterns of diversification in the discus fishes (*Symphysodon* spp.  
523 Cichlidae) of the Amazon basin. *Molecular Phylogenetics and Evolution*, **49**, 32–43.
- 524 Farias, I.P., Willis, S., Leão, A., Verba, J.T., Crossa, M., Foresti, F., Porto-Foresti, F., Sampaio,  
525 I., & Hrbek, T. (2019) The largest fish in the world’s biggest river: Genetic connectivity and  
526 conservation of *Arapaima gigas* in the Amazon and Araguaia-Tocantins drainages. *PLOS*  
527 *ONE*, **14**, e0220882.
- 528 Fassoni-Andrade, A.C. & Paiva, R.C.D. de (2019) Mapping spatial-temporal sediment dynamics  
529 of river-floodplains in the Amazon. *Remote Sensing of Environment*, **221**, 94–107.
- 530 Filizola, N. & Guyot, J.L. (2009) Suspended sediment yields in the Amazon basin: an assessment  
531 using the Brazilian national data set. *Hydrological Processes*, **23**, 3207–3215.
- 532 Fischer, M.L., Salgado, I., Beninde, J., Klein, R., Frantz, A.C., Heddergott, M., Cullingham, C.I.,  
533 Kyle, C.J., & Hochkirch, A. (2017) Multiple founder effects are followed by range  
534 expansion and admixture during the invasion process of the raccoon (*Procyon lotor*) in  
535 Europe. *Diversity & Distributions*, **23**, 409–420.
- 536 François, O., Currat, M., Ray, N., Han, E., Excoffier, L., & Novembre, J. (2010) Principal  
537 component analysis under population genetic models of range expansion and admixture.  
538 *Molecular Biology and Evolution*, **27**, 1257–1268.
- 539 Frichot, E., Mathieu, F., Trouillon, T., Bouchard, G., & François, O. (2014) Fast and efficient  
540 estimation of individual ancestry coefficients. *Genetics*, **196**, 973–983.
- 541 Gehara, M., Garda, A.A., Werneck, F.P., Oliveira, E.F., da Fonseca, E.M., Camurugi, F.,  
542 Magalhães, F. de M., Lanna, F.M., Sites, J.W., Jr, Marques, R., Silveira-Filho, R., São  
543 Pedro, V.A., Colli, G.R., Costa, G.C., & Burbrink, F.T. (2017) Estimating synchronous  
544 demographic changes across populations using hABC and its application for a  
545 herpetological community from northeastern Brazil. *Molecular Ecology*, **26**, 4756–4771.
- 546 Govin, A., Chiessi, C.M., Zabel, M., Sawakuchi, A.O., Heslop, D., Hörner, T., Zhang, Y., &  
547 Mulitza, S. (2013) Terrigenous input off northern South America driven by changes in  
548 Amazonian climate and the North Brazil Current retroflexion during the last 250 ka.  
549 *Climate of the Past Discussions*, **9**, 5855–5898.
- 550 Grabherr, M.G., Haas, B.J., Yassour, M., et al. (2011) Full-length transcriptome assembly from  
551 RNA-Seq data without a reference genome. *Nature Biotechnology*, **29**, 644–652.
- 552 Gualtieri, C., Filizola, N., de Oliveira, M., Santos, A.M., & Ianniruberto, M. (2018) A field study  
553 of the confluence between Negro and Solimões Rivers. Part 1: Hydrodynamics and

- 554 sediment transport. *Comptes Rendus Geoscience*, **350**, 31–42.
- 555 Guarnizo, C.E., Werneck, F.P., Giugliano, L.G., Santos, M.G., Fenker, J., Sousa, L.,  
556 D'Angiolella, A.B., Dos Santos, A.R., Strüssmann, C., Rodrigues, M.T., Dorado-Rodrigues,  
557 T.F., Gamble, T., & Colli, G.R. (2016) Cryptic lineages and diversification of an endemic  
558 anole lizard (Squamata, Dactyloidae) of the Cerrado hotspot. *Molecular Phylogenetics and*  
559 *Evolution*, **94**, 279–289.
- 560 Hackett, S.J., Kimball, R.T., Reddy, S., Bowie, R.C.K., Braun, E.L., Braun, M.J., Chojnowski,  
561 J.L., Cox, W.A., Han, K.-L., Harshman, J., Huddleston, C.J., Marks, B.D., Miglia, K.J.,  
562 Moore, W.S., Sheldon, F.H., Steadman, D.W., Witt, C.C., & Yuri, T. (2008) A  
563 phylogenomic study of birds reveals their evolutionary history. *Science*, **320**, 1763–1768.
- 564 Haffer, J. (1969) Speciation in amazonian forest birds. *Science*, **165**, 131–137.
- 565 Haffer, J. (1997) Alternative models of vertebrate speciation in Amazonia: an overview.  
566 *Biodiversity & Conservation*, **6**, 451–476.
- 567 Harpending, H.C. (1994) Signature of ancient population growth in a low-resolution  
568 mitochondrial DNA mismatch distribution. *Human Biology*, **66**, 591–600.
- 569 He, Q., Prado, J.R., & Knowles, L.L. (2017) Inferring the geographic origin of a range  
570 expansion: Latitudinal and longitudinal coordinates inferred from genomic data in an ABC  
571 framework with the program x-origin. *Molecular Ecology*, **26**, 6908–6920.
- 572 Hewitt, G. (2000) The genetic legacy of the Quaternary ice ages. *Nature*, **405**, 907–913.
- 573 Hewitt, G.M. (2004) Biodiversity: A climate for colonization. *Heredity*, **92**, 1–2.
- 574 Hijmans, R.J. & van Etten, J. (2013) Raster: raster: Geographic data analysis and modeling. *R*  
575 *package version*, 2–3.
- 576 Hrbek, T., Farias, I.P., Crossa, M., Sampaio, I., Porto, J.I.R., & Meyer, A. (2005) Population  
577 genetic analysis of *Arapaima gigas*, one of the largest freshwater fishes of the Amazon  
578 basin: implications for its conservation. *Animal Conservation*, **8**, 297–308.
- 579 Irion, G., Müller, J., Morais, J.O., Keim, G., de Mello, J.N., & Junk, W.J. (2009) The impact of  
580 Quaternary sea level changes on the evolution of the Amazonian lowland. *Hydrological*  
581 *Processes*, **23**, 3168–3172.
- 582 Jardim de Queiroz, L., Torrente-Vilara, G., Quilodran, C., Rodrigues da Costa Doria, C., &  
583 Montoya-Burgos, J.I. (2017) Multifactorial genetic divergence processes drive the onset of  
584 speciation in an Amazonian fish. *PloS One*, **12**, e0189349.
- 585 Jombart, T. & Ahmed, I. (2011) adegenet 1.3-1: new tools for the analysis of genome-wide SNP  
586 data. *Bioinformatics*, **27**, 3070–3071.

- 587 Junk, W.J., Piedade, M.T.F., Schöngart, J., Cohn-Haft, M., Adeney, J.M., & Wittmann, F. (2011)  
588 A classification of major naturally-occurring Amazonian lowland wetlands. *Wetlands*, **31**,  
589 623–640.
- 590 Junk, W.J., Piedade, M.T.F., Schöngart, J., & Wittmann, F. (2012) A classification of major  
591 natural habitats of Amazonian white-water river floodplains (várzeas). *Wetlands Ecology  
592 and Management*, **20**, 461–475.
- 593 Junk, W.J., Wittmann, F., Schöngart, J., & Piedade, M.T.F. (2015) A classification of the major  
594 habitats of Amazonian black-water river floodplains and a comparison with their white-  
595 water counterparts. *Wetlands Ecology and Management*, **23**, 677–693.
- 596 Katoh, K. & Standley, D.M. (2013) MAFFT multiple sequence alignment software version 7:  
597 improvements in performance and usability. *Molecular Biology and Evolution*, **30**, 772–  
598 780.
- 599 Kimball, R.T., Braun, E.L., Barker, F.K., Bowie, R.C.K., Braun, M.J., Chojnowski, J.L.,  
600 Hackett, S.J., Han, K.-L., Harshman, J., Heimer-Torres, V., Holznagel, W., Huddleston,  
601 C.J., Marks, B.D., Miglia, K.J., Moore, W.S., Reddy, S., Sheldon, F.H., Smith, J.V., Witt,  
602 C.C., & Yuri, T. (2009) A well-tested set of primers to amplify regions spread across the  
603 avian genome. *Molecular Phylogenetics and Evolution*, **50**, 654–660.
- 604 Laranjeiras, T.O., Naka, L.N., Leite, G.A., & Cohn Haft, M. (2021) Effects of a major  
605 Amazonian river confluence on the distribution of floodplain forest avifauna. *Journal of  
606 Biogeography*, **48**, 847-860.
- 607 Latrubesse, E.M., Arima, E.Y., Dunne, T., Park, E., Baker, V.R., d’Horta, F.M., Wight, C.,  
608 Wittmann, F., Zuanon, J., Baker, P.A., Ribas, C.C., Norgaard, R.B., Filizola, N., Ansar, A.,  
609 Flyvbjerg, B., & Stevaux, J.C. (2017) Damming the rivers of the Amazon basin. *Nature*,  
610 **546**, 363–369.
- 611 Latrubesse, E.M. & Franzinelli, E. (2005) The late Quaternary evolution of the Negro River,  
612 Amazon, Brazil: Implications for island and floodplain formation in large anabranching  
613 tropical systems. *Geomorphology*, **70**, 372–397.
- 614 Latrubesse, E.M. & Stevaux, J.C. (2015) The Anavilhanas and Mariuá Archipelagos: Fluvial  
615 Wonders from the Negro River, Amazon Basin. *World Geomorphological Landscapes*,  
616 157–169.
- 617 Li, H. & Durbin, R. (2009) Fast and accurate short read alignment with Burrows–Wheeler  
618 transform. *Bioinformatics*, **25**, 1754–1760.
- 619 Li, H., Handsaker, B., Wysoker, A., Fennell, T., Ruan, J., Homer, N., Marth, G., Abecasis, G.,  
620 Durbin, R., & 1000 Genome Project Data Processing Subgroup (2009) The Sequence  
621 Alignment/Map format and SAMtools. *Bioinformatics*, **25**, 2078–2079.

- 622 McKenna, A., Hanna, M., Banks, E., Sivachenko, A., Cibulskis, K., Kernysky, A., Garimella,  
623 K., Altshuler, D., Gabriel, S., Daly, M., & DePristo, M.A. (2010) The Genome Analysis  
624 Toolkit: a MapReduce framework for analyzing next-generation DNA sequencing data.  
625 *Genome Research*, **20**, 1297–1303.
- 626 Musher, L.J., Galante, P.J., Thom, G., Huntley, J.W., & Blair, M.E. (2020) Shifting ecosystem  
627 connectivity during the Pleistocene drove diversification and gene flow in a species  
628 complex of Neotropical birds (Tityridae: *Pachyramphus*). *Journal of Biogeography*, **47**,  
629 1714–1726.
- 630 Passos, M.S., Soares, E.A.A., Tatumi, S.H., Yee, M., Mittani, J.C.R., Hayakawa, E.H., &  
631 Salazar, C.A. (2020) Pleistocene-Holocene sedimentary deposits of the Solimões-Amazonas  
632 fluvial system, Western Amazonia. *Journal of South American Earth Sciences*, **98**, 102455.
- 633 Pekel, J.-F., Cottam, A., Gorelick, N., & Belward, A.S. (2016) High-resolution mapping of  
634 global surface water and its long-term changes. *Nature*, **540**, 418–422.
- 635 Peter, B.M., Petkova, D., & Novembre, J. (2020) Genetic Landscapes Reveal How Human  
636 Genetic Diversity Aligns with Geography. *Molecular Biology and Evolution*, **37**, 943–951.
- 637 Peter, B.M. & Slatkin, M. (2013) Detecting range expansions from genetic data. *Evolution;*  
638 *International Journal of Organic Evolution*, **67**, 3274–3289.
- 639 Peter, B.M. & Slatkin, M. (2015) The effective founder effect in a spatially expanding  
640 population. *Evolution; International Journal of Organic Evolution*, **69**, 721–734.
- 641 Petkova, D., Novembre, J., & Stephens, M. (2016) Visualizing spatial population structure with  
642 estimated effective migration surfaces. *Nature Genetics*, **48**, 94–100.
- 643 Potter, S., Bragg, J.G., Peter, B.M., Bi, K., & Moritz, C. (2016) Phylogenomics at the tips:  
644 inferring lineages and their demographic history in a tropical lizard, *Carlia amax*.  
645 *Molecular Ecology*, **25**, 1367–1380.
- 646 Prates, I., Xue, A.T., Brown, J.L., Alvarado-Serrano, D.F., Rodrigues, M.T., Hickerson, M.J., &  
647 Carnaval, A.C. (2016) Inferring responses to climate dynamics from historical demography  
648 in neotropical forest lizards. *Proceedings of the National Academy of Sciences of the United*  
649 *States of America*, **113**, 7978–7985.
- 650 Pupim, F.N., Sawakuchi, A.O., Almeida, R.P., Ribas, C.C., Kern, A.K., Hartmann, G.A.,  
651 Chiessi, C.M., Tamura, L.N., Mineli, T.D., Savian, J.F., Grohmann, C.H., Bertassoli, D.J.,  
652 Stern, A.G., Cruz, F.W., & Cracraft, J. (2019) Chronology of Terra Firme formation in  
653 Amazonian lowlands reveals a dynamic Quaternary landscape. *Quaternary Science*  
654 *Reviews*, **210**, 154–163.
- 655 Raposo do Amaral, F., Maldonado-Coelho, M., Aleixo, A., Luna, L.W., Rêgo, P.S. do, Araripe,  
656 J., Souza, T.O., Silva, W.A.G., & Thom, G. (2018) Recent chapters of Neotropical history

- 657 overlooked in phylogeography: Shallow divergence explains phenotype and genotype  
658 uncoupling in *Antilophia* manakins. *Molecular Ecology*, **27**, 4108–4120.
- 659 Reid, B.N., Kass, J.M., Wollney, S., Jensen, E.L., Russello, M.A., Viola, E.M., Pantophlet, J.,  
660 Iverson, J.B., Peery, M.Z., Raxworthy, C.J., & Naro-Maciel, E. (2019) Disentangling the  
661 genetic effects of refugial isolation and range expansion in a trans-continentially distributed  
662 species. *Heredity*, **122**, 441–457.
- 663 Remsen, J.V., Jr & Parker, T.A., III (1983) Contribution of river-created habitats to bird species  
664 richness in Amazonia. *Biotropica*, **15**, 223–231.
- 665 Selkoe, K.A., Scribner, K.T., & Galindo, H.M. (2015) Waterscape genetics--applications of  
666 landscape genetics to rivers, lakes, and seas. *Landscape Genetics*, **13**, 220–246.
- 667 Silva, S.M., Peterson, A.T., Carneiro, L., et al. (2019) A dynamic continental moisture gradient  
668 drove Amazonian bird diversification. *Science Advances*, **5**, eaat5752.
- 669 Soares, E.A.A., Tatumi, S.H., & Riccomini, C. (2010) OSL age determinations of Pleistocene  
670 fluvial deposits in Central Amazonia. *Anais da Academia Brasileira de Ciências*, **82**, 691–  
671 699.
- 672 Taberlet, P. & Cheddadi, R. (2002) Ecology. Quaternary refugia and persistence of biodiversity.  
673 *Science*, **297**, 2009–2010.
- 674 Thomaz, A.T., Christie, M.R., & Knowles, L.L. (2016) The architecture of river networks can  
675 drive the evolutionary dynamics of aquatic populations. *Evolution; International Journal of*  
676 *Organic Evolution*, **70**, 731–739.
- 677 Thom, G., Do Amaral, F.R., Hickerson, M.J., Aleixo, A., Araujo-Silva, L.E., Ribas, C.C.,  
678 Choueri, E., & Miyaki, C.Y. (2018) Phenotypic and genetic structure support gene flow  
679 generating gene tree discordances in an Amazonian Floodplain Endemic Species.  
680 *Systematic Biology*, **67**, 700–718.
- 681 Thom, G., Smith, B.T., Gehara, M., Montesanti, J., Lima-Ribeiro, M.S., Piacentini, V.Q.,  
682 Miyaki, C.Y., & do Amaral, F.R. (2020a) Climatic dynamics and topography control  
683 genetic variation in Atlantic Forest montane birds. *Molecular Phylogenetics and Evolution*,  
684 **148**, 106812.
- 685 Thom, G., Xue, A.T., Sawakuchi, A.O., Ribas, C.C., Hickerson, M.J., Aleixo, A., & Miyaki, C.  
686 (2020b) Quaternary climate changes as speciation drivers in the Amazon floodplains.  
687 *Science Advances*, **6**, eaax4718.
- 688 Wisz, M.S., Pottier, J., Kissling, W.D., et al. (2013) The role of biotic interactions in shaping  
689 distributions and realised assemblages of species: implications for species distribution  
690 modelling. *Biological Reviews of the Cambridge Philosophical Society*, **88**, 15–30.

691 Zimmer, K. & Isler, M.L. (2016) Typical Antbirds (Thamnophilidae). *Handbook of the Birds of*  
692 *the World Alive*. J. del Hoyo, A. Elliott, J. Sargatal, DA Christie. E. de Juana (Eds). Lynx  
693 Edicions: Barcelona. Available at <http://www.hbw.com/node/52291> [Verified 29 July  
694 2016].

695

696

697

698

699

700

701

702

703

704

705

706

707

708

709

710

711

712

713

714

715 Table 1: Summary of results obtained with rangeExpansion for three species of birds occurring  
716 across the Solimoes River.

| <b>Parameters</b> | <b><i>M. lugubris</i></b> | <b><i>T. cryptoleucus</i></b> | <b><i>M. assimilis</i></b> |
|-------------------|---------------------------|-------------------------------|----------------------------|
| longitude         | -62.95                    | -73.22144                     | -75.64357                  |
| latitude          | -4.021451                 | -9.999475                     | -3148                      |
| r1                | 0.999                     | 0.999                         | 0.999                      |

|                |       |          |       |
|----------------|-------|----------|-------|
| r10            | 0.996 | 0.991    | 0.997 |
| r100           | 0.964 | 0.918    | 0.975 |
| d1             | 27.19 | 11.45    | 40.80 |
| r <sup>2</sup> | 0.45  | 0.89     | 0.31  |
| p-value        | 36.17 | 2.10e-23 | 11.26 |

717 r1, r10, and r100 - decrease in diversity at 1, 10, and 100 kilometers of distance, respectively; d1  
 718 – effective founder distance, which represents the deme size in km for the effective population  
 719 size to be reduced by 1% in the expansion front; r<sup>2</sup> and p-value - correlation coefficient and  
 720 correlation p-value for the most likely origin, respectively.

721

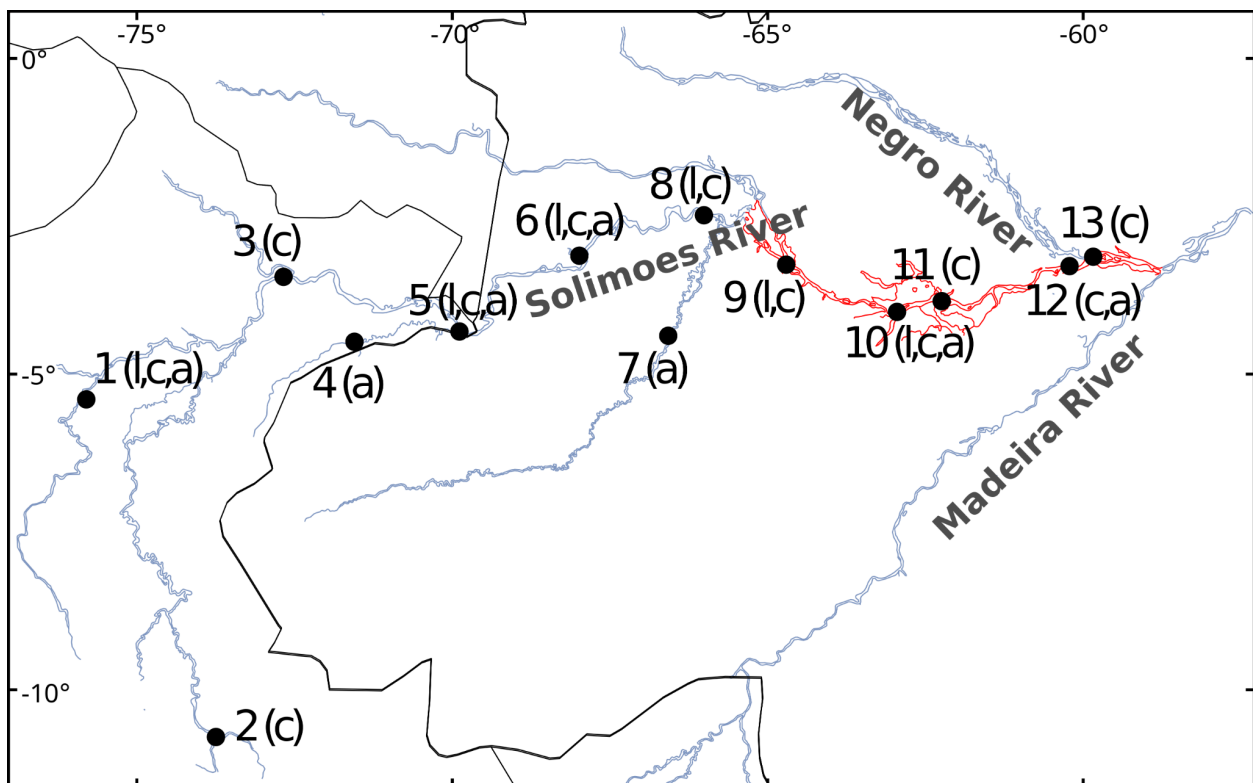

722

723

724 Figure 1: Geographic distribution of sampled individuals of *Myrmoborus lugubris* (l),  
 725 *Thamnophilus cryptoleucus* (c), and *Myrmotherula assimilis* (a) across the Solimões River Basin.  
 726 Numbers in the map represent localities as in Table S1. In red is the putative zone of unstable



727 habitats following the range expansion hypothesis.

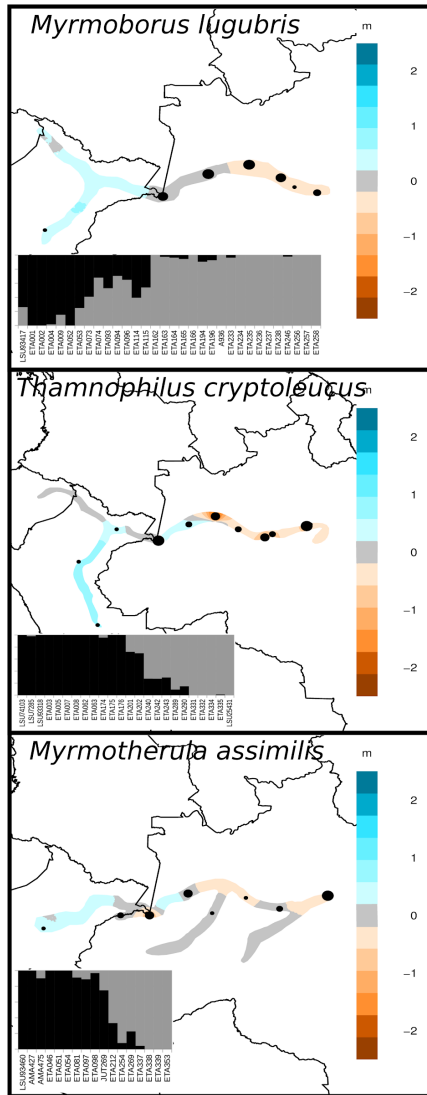

728

729 Figure 2: Estimated effective migration surface (EEMS) and population structure and individual  
730 coefficient of ancestry (bars) inferred with sNMF for the three species studied. Colors in the map  
731 represent a log10 scale from the average effective migration (gray). Codes below the bars in the  
732 admixture plot represent identification numbers of individuals as in Table S1. Note that for *M.*  
733 *assimilis*, K=2 was the model with the second-highest cross-entropy value.

734

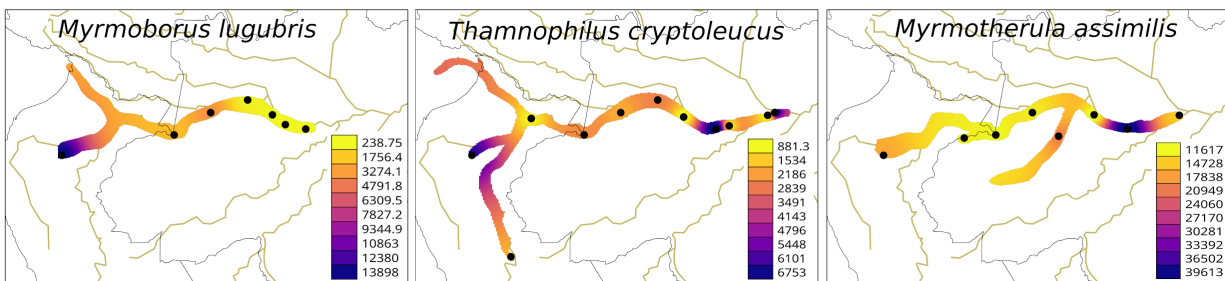

735  
 736 Figure 3: Interpolated Harpending's raggedness index estimated from the geographic spectrum  
 737 of shared alleles (GSSA) histograms. Lower values represent the most likely source of a serial  
 738 range expansion.

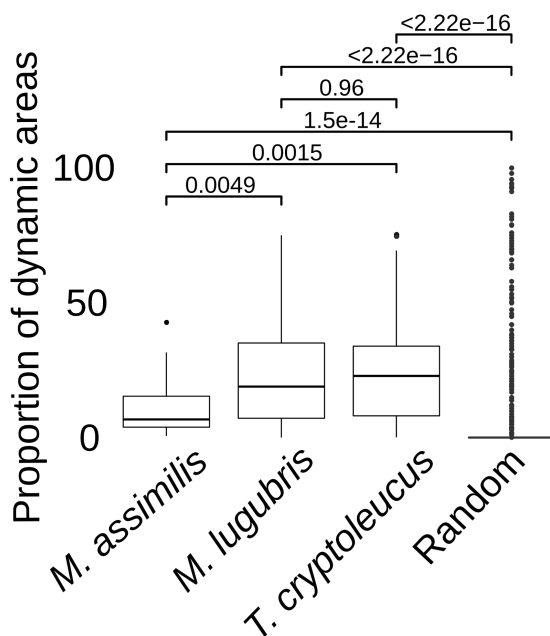

739  
 740  
 741 Figure 4: Average river dynamism on 1000 meters radius around randomly drawn points and  
 742 occurrence records for *M. assimilis*, *M. lugubris*, and *T. cryptoleucus*. River dynamism was  
 743 calculated based on the "Water Occurrence Change" layer available at [https://global-surface-](https://global-surface-water.appspot.com/)  
 744 [water.appspot.com/](https://global-surface-water.appspot.com/). Higher values represent higher river dynamicity. The pairwise comparisons  
 745 show p-values for Wilcoxon tests between species and random points.

746  
 747
